# Supplementary material for: Incidence of Idiopathic Intracranial Hypertension in Individuals With Gonadotropin-Releasing Hormone Analogue Treatment for Gender Dysphoria in Sweden
Source: PubMed Central journal article supplement (PMC10152371; doi:10.1001/jamapediatrics.2023.0656), 2023-05-01
Supplement: jamapediatr-e230656-s002.pdf [file jamapediatr-e230656-s002.pdf]

## Data Sharing Statement

Karamanis. Incidence of Idiopathic Intracranial Hypertension in Individuals With Gonadotropin-Releasing Hormone Analogue Treatment for Gender Dysphoria in Sweden. *JAMA Pediatr.* Published May 01, 2023. doi:10.1001/jamapediatrics.2023.0656

### Data

**Data available:** No
